# Supplementary material for: Contrasting breast cancer molecular subtypes across serial tumor progression stages: biological and prognostic implications
Source: PubMed Central journal article supplement (PMC4741767; doi:10.18632/oncotarget.5089), 2015-09-08
Supplement: oncotarget-06-33306-s001.pdf [file oncotarget-06-33306-s001.pdf]

## SUPPLEMENTARY TABLE

**Supplementary Table S1: Baseline clinical and pathological characteristics of patients and primary tumors for the entire study cohort and the subsets of patients included on the two different tissue microarrays (TMAs)**

|                                   | Tissue Microarrays (TMAs) |                          |                           |
|-----------------------------------|---------------------------|--------------------------|---------------------------|
|                                   | All Patients (N = 304)    | Primary Tumors (N = 217) | Synchronous LNM (N = 111) |
|                                   | N (%)                     | N (%)                    | N (%)                     |
| <b>Age at diagnosis</b>           |                           |                          |                           |
| Median (range)                    | 50 (27–71)                | 51 (27–71)               | 51 (27–71)                |
| < 50 years                        | 154 (51%)                 | 97 (45%)                 | 52 (42%)                  |
| ≥ 50 years                        | 149 (49%)                 | 118 (55%)                | 72 (58%)                  |
| Missing/unknown                   | 1                         | 2                        | 0                         |
| <b>Histological grade</b>         |                           |                          |                           |
| 1/2                               | 121 (49%)                 | 80 (43%)                 | 39 (43%)                  |
| 3                                 | 125 (51%)                 | 105 (57%)                | 52 (57%)                  |
| Missing/unknown                   | 58                        | 32                       | 20                        |
| <b>Tumor size</b>                 |                           |                          |                           |
| ≤ 20 mm                           | 119 (40%)                 | 84 (40%)                 | 31 (28%)                  |
| > 20 mm                           | 180 (60%)                 | 128 (60%)                | 79 (72%)                  |
| Missing/unknown                   | 5                         | 5                        | 1                         |
| <b>Nodal status</b>               |                           |                          |                           |
| N0                                | 92 (31%)                  | 68 (33%)                 | 0 (0%)                    |
| N+                                | 203 (69%)                 | 141 (67%)                | 111 (100%)                |
| Missing/unknown                   | 9                         | 8                        | 0                         |
| <b>Adjuvant chemotherapy</b>      |                           |                          |                           |
| Yes                               | 150 (49%)                 | 101 (47%)                | 72 (65%)                  |
| No                                | 152 (50%)                 | 114 (53%)                | 39 (35%)                  |
| Missing/unknown                   | 2                         | 2                        | 0                         |
| <b>Adjuvant endocrine therapy</b> |                           |                          |                           |
| Yes                               | 156 (52%)                 | 117 (54%)                | 70 (63%)                  |
| No                                | 147 (48%)                 | 99 (46%)                 | 41 (37%)                  |
| Missing/unknown                   | 1                         | 1                        | 0                         |
| <b>Adjuvant radiotherapy</b>      |                           |                          |                           |
| Yes                               | 214 (71%)                 | 154 (72%)                | 84 (76%)                  |
| No                                | 87 (29%)                  | 60 (28%)                 | 26 (24%)                  |
| Missing/unknown                   | 3                         | 3                        | 1                         |

(Continued)

| <b>Tissue Microarrays (TMAs)</b> |                               |                                 |                                   |
|----------------------------------|-------------------------------|---------------------------------|-----------------------------------|
|                                  | <b>All Patients (N = 304)</b> | <b>Primary Tumors (N = 217)</b> | <b>Synchronous LNMs (N = 111)</b> |
|                                  | <i>N (%)</i>                  | <i>N (%)</i>                    | <i>N (%)</i>                      |
| <b>Metastasis-free interval</b>  |                               |                                 |                                   |
| Locally-advanced                 | 47 (16%)                      | 14 (7%)                         | 15 (13%)                          |
| < 5 years                        | 147 (48%)                     | 124 (57%)                       | 66 (60%)                          |
| ≥ 5 years                        | 110 (36%)                     | 79 (36%)                        | 30 (27%)                          |
| Missing/unknown                  | 0                             | 0                               | 0                                 |
| <b>Site of recurrence</b>        |                               |                                 |                                   |
| Loco-regional                    | 50 (17%)                      | 38 (18%)                        | 19 (17%)                          |
| Bone                             | 56 (18%)                      | 38 (18%)                        | 21 (19%)                          |
| Lung                             | 63 (21%)                      | 45 (21%)                        | 21 (19%)                          |
| Liver                            | 133 (44%)                     | 94 (43%)                        | 50 (45%)                          |
| Missing/unknown                  | 2                             | 1                               |                                   |
